# Supplementary material for: Aberrant Akt2 signaling in the RPE may contribute to retinal fibrosis process in diabetic retinopathy
Source: PubMed Central journal article supplement (PMC10345150; doi:10.1038/s41420-023-01545-4), 2023-07-13

Figure 1 A

Phospho-Akt1  
(Ser473)

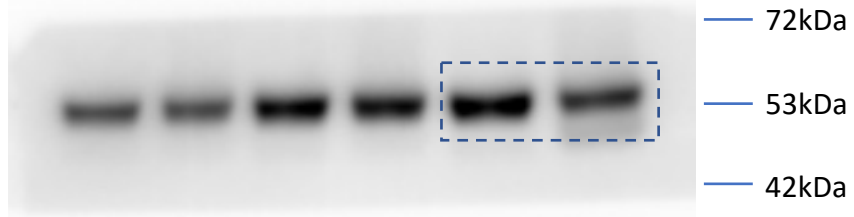

Phospho-Akt2  
(Ser474)

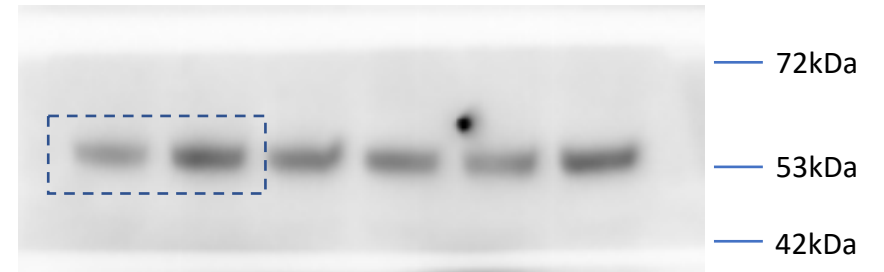

Akt1

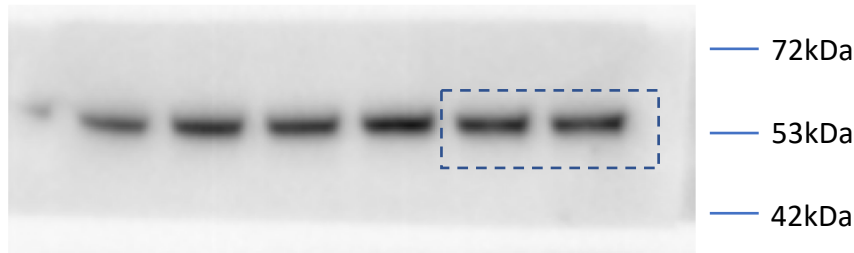

Akt2

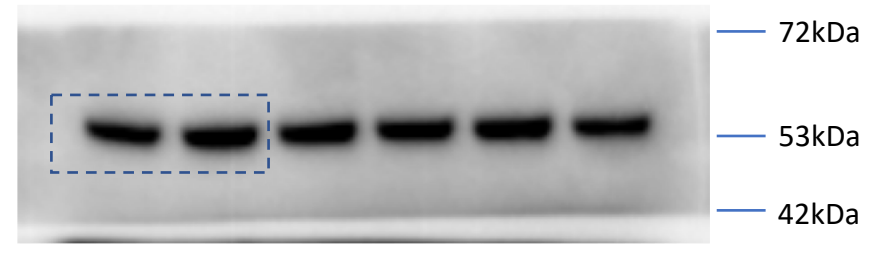

Actin

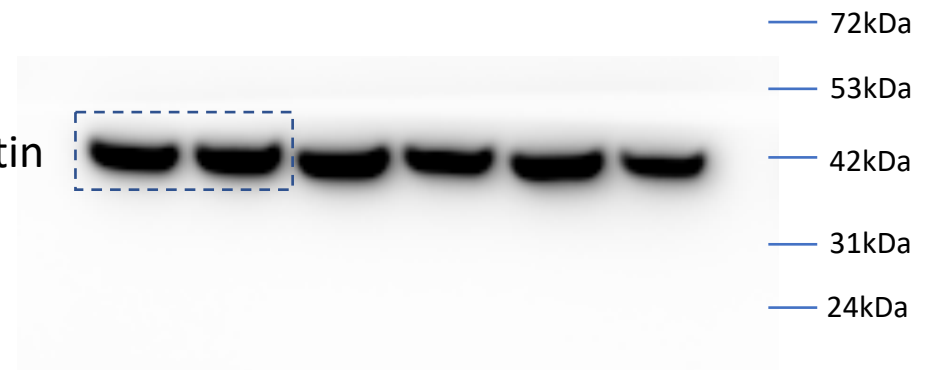

Figure 1 C

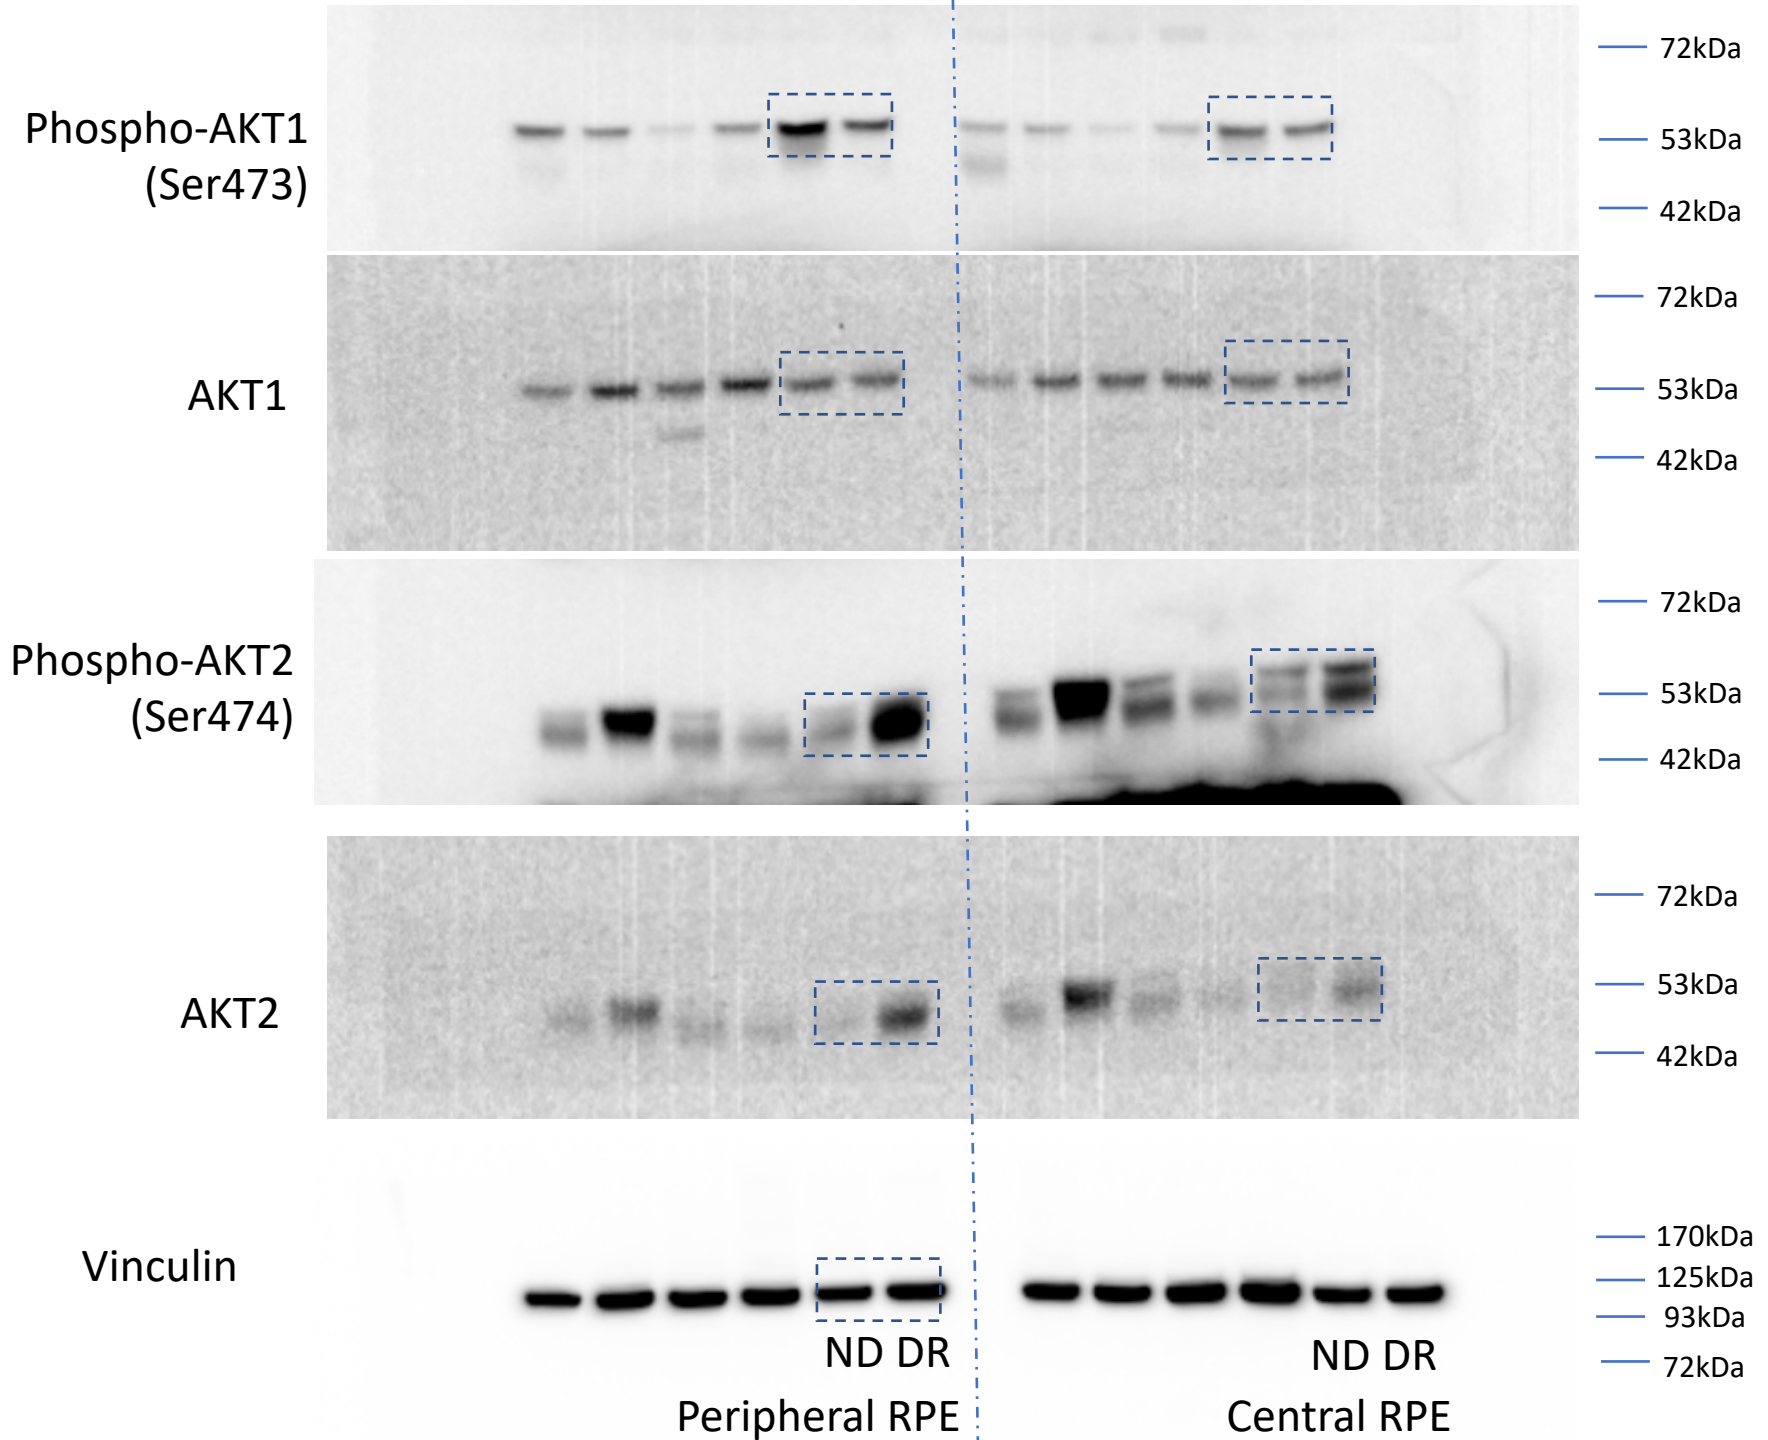

Figure 2 B

Phospho-Akt2  
(Ser474)

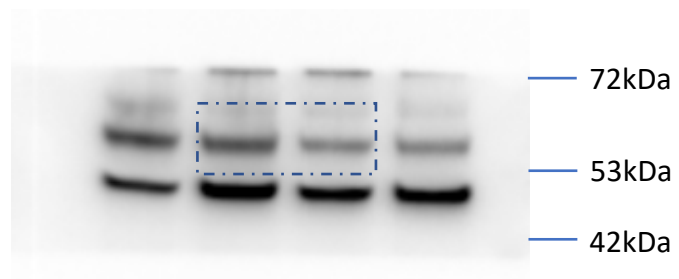

Akt2

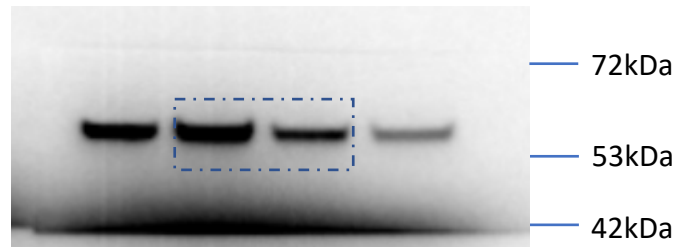

Actin

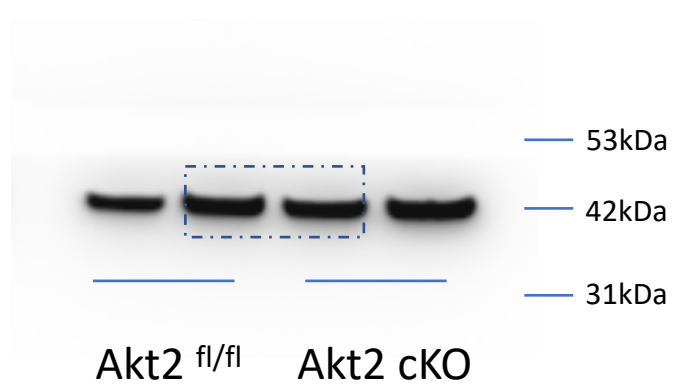

Figure 4 A

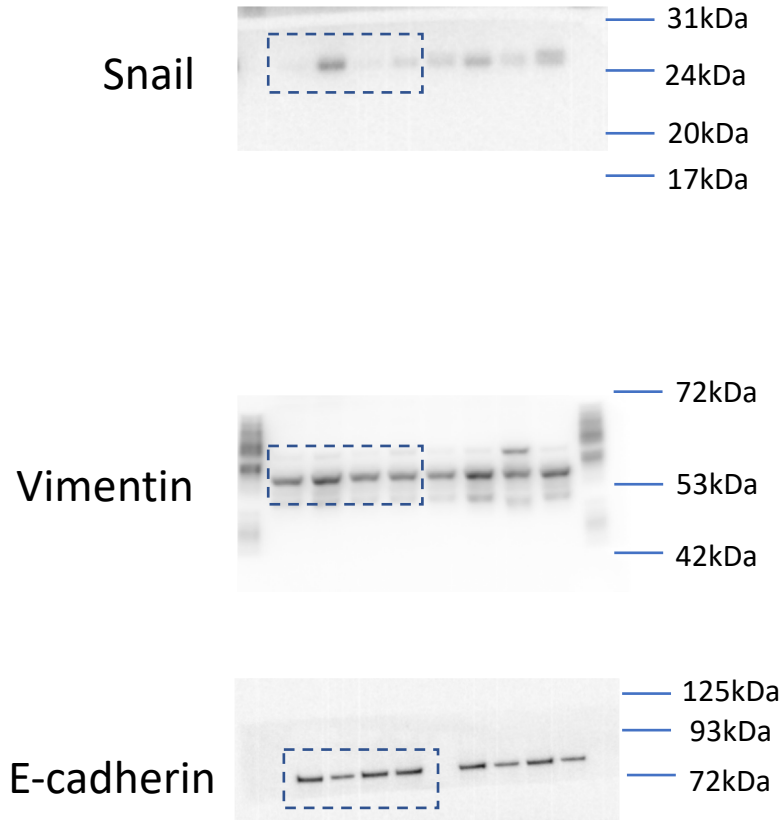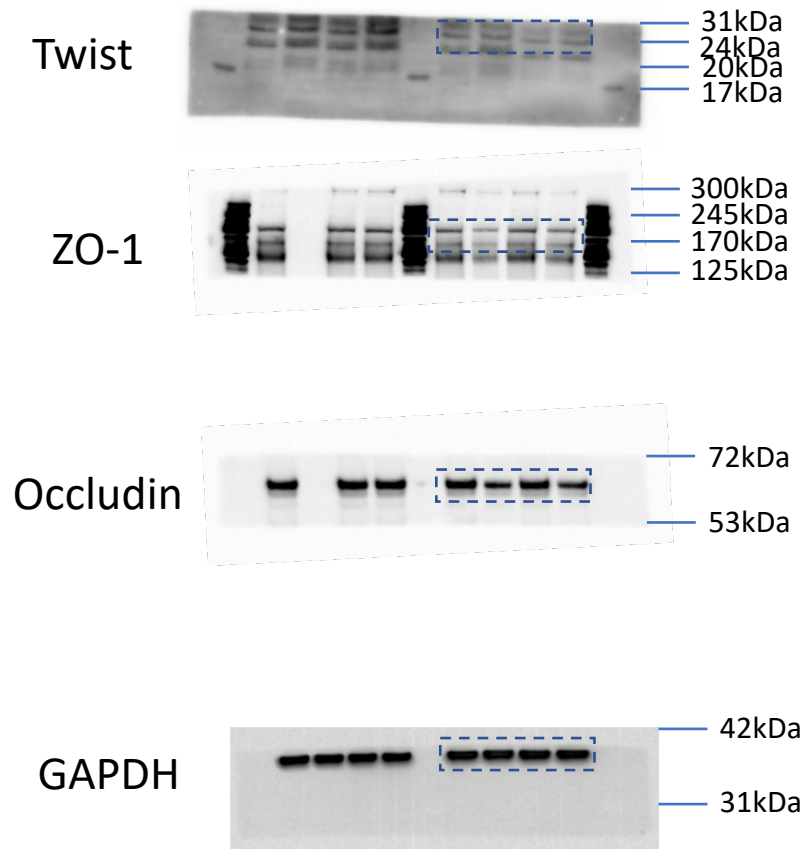

Figure 6 B

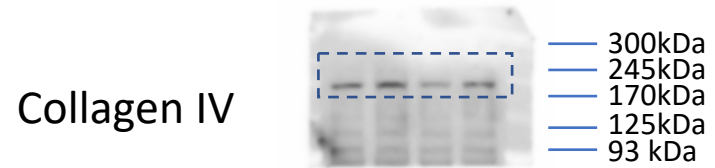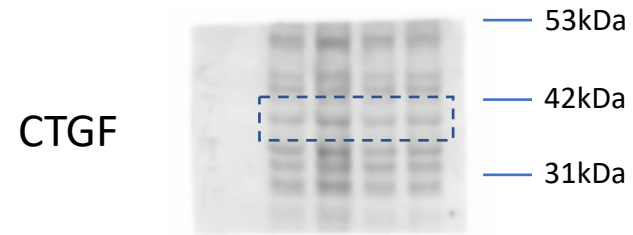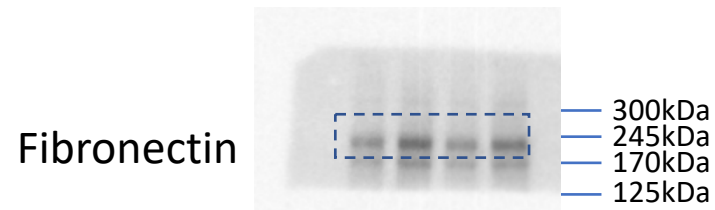

Alpha SMA

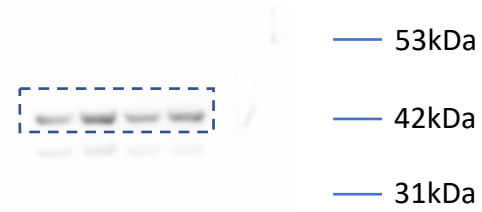

Vinculin

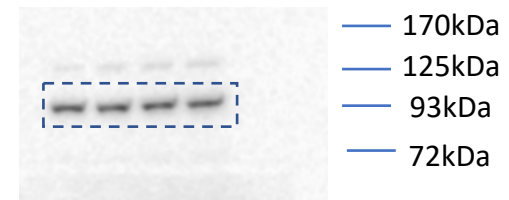

Figure 7 A

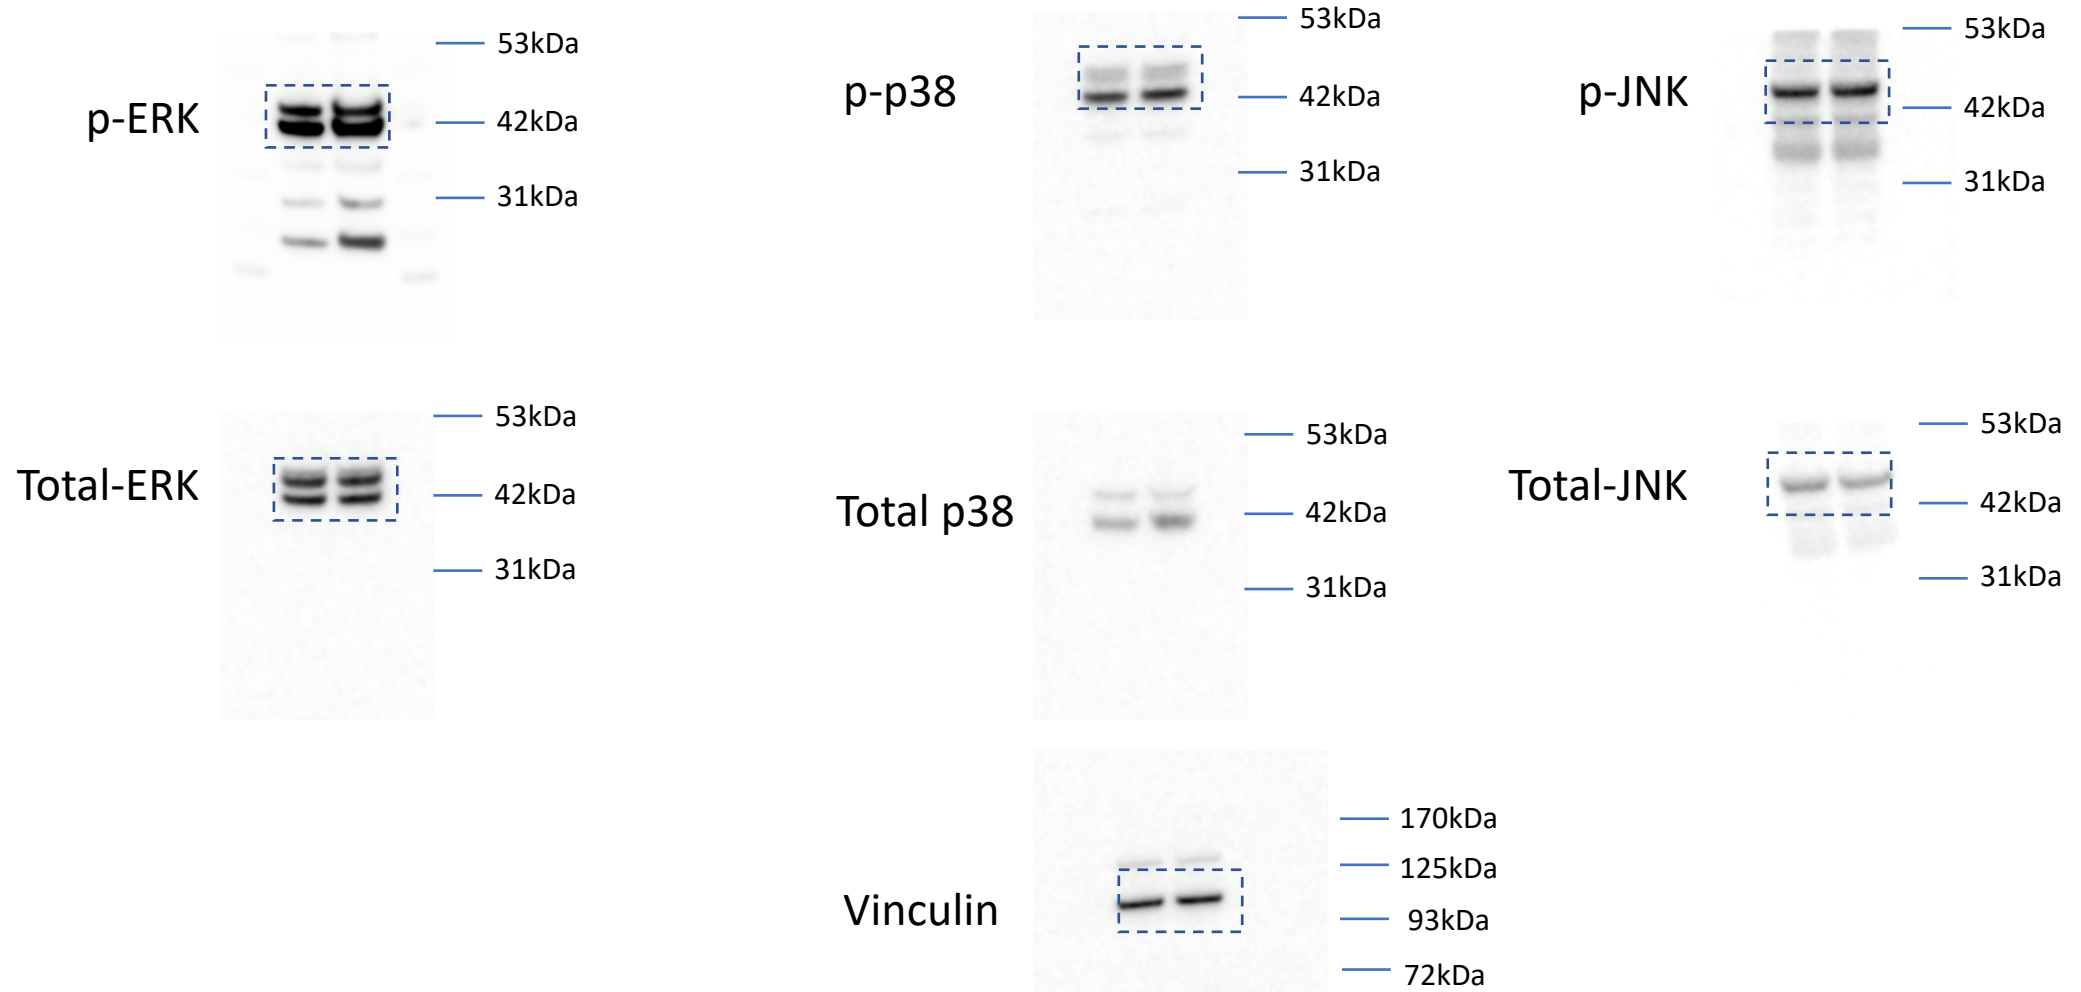

Figure 7 D

Collagen IV

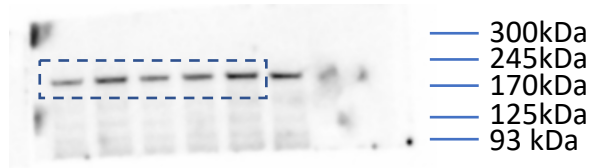

CTGF

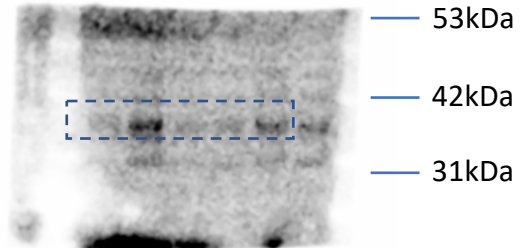

Fibronectin

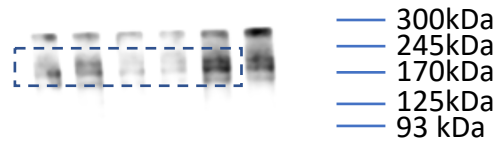

Alpha-SMA

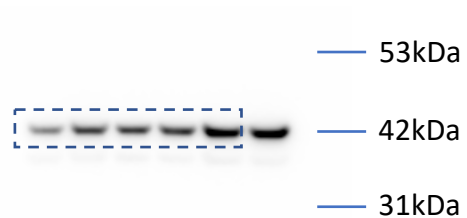

Vinculin

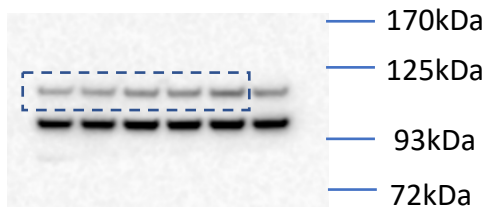

Snail

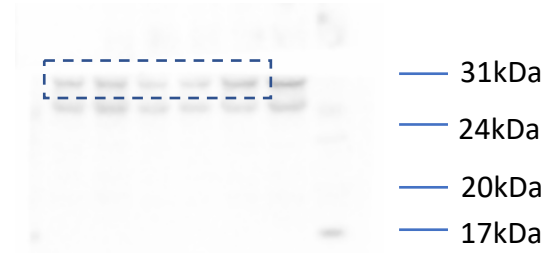

Twist

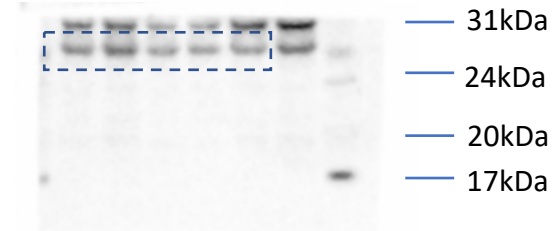

p-Akt2

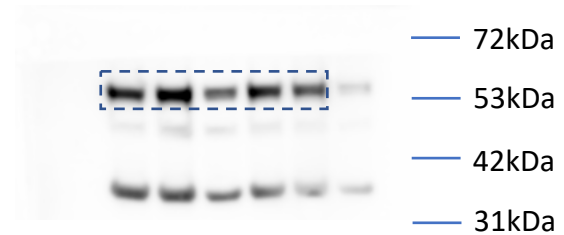

total-Akt2

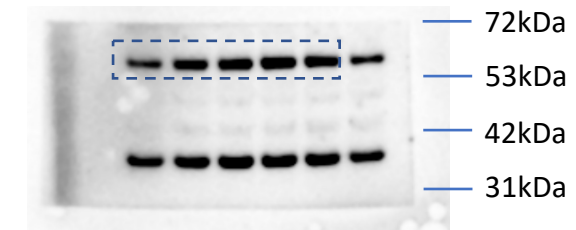

Vinculin

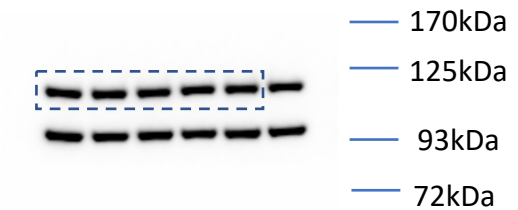

Supplement: 41420_2023_1545_MOESM4_ESM.pdf [file 41420_2023_1545_MOESM4_ESM.pdf]
